# Supplementary material
Source: ML conference proceedings conference paper supplement (https://openreview.net/forum?id=YVD1QqWRaj)

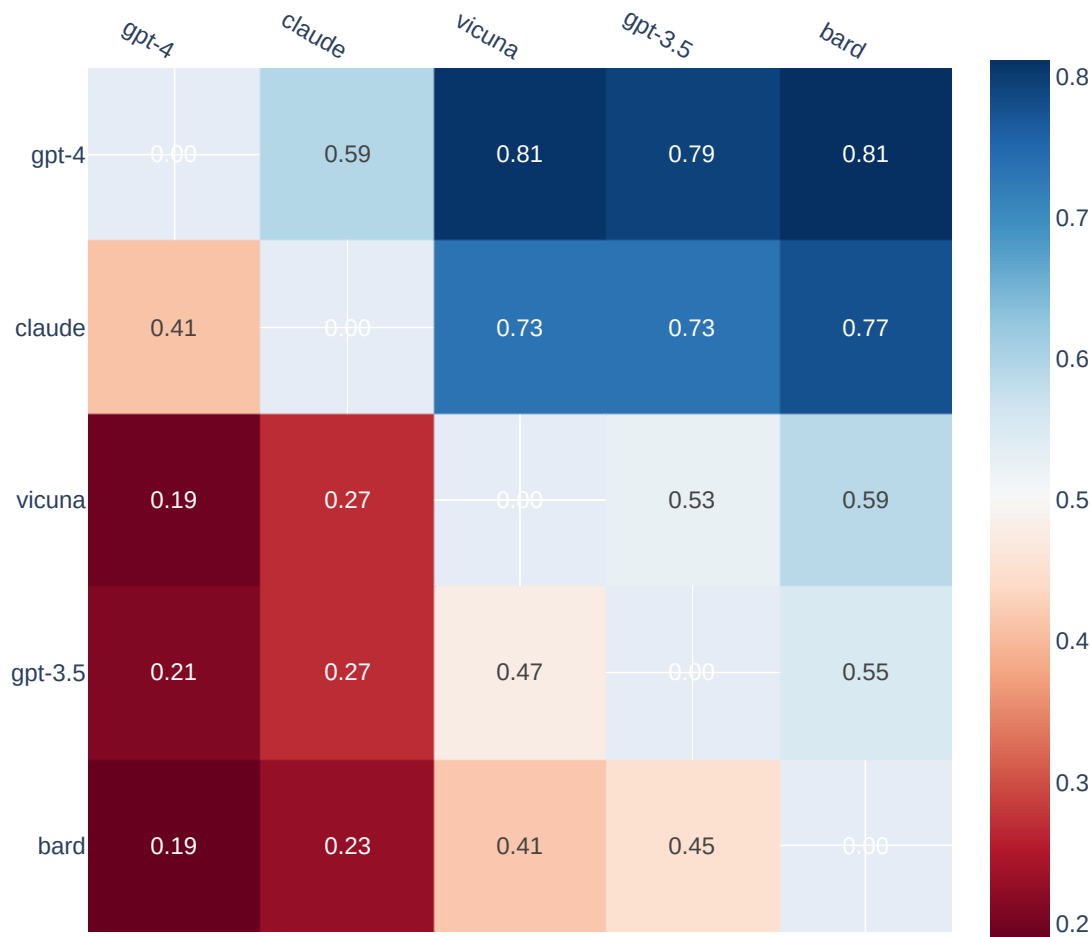

Supplement: supplementary_material [file attachment]

## Elo of GPT-3.5 from various reviewers

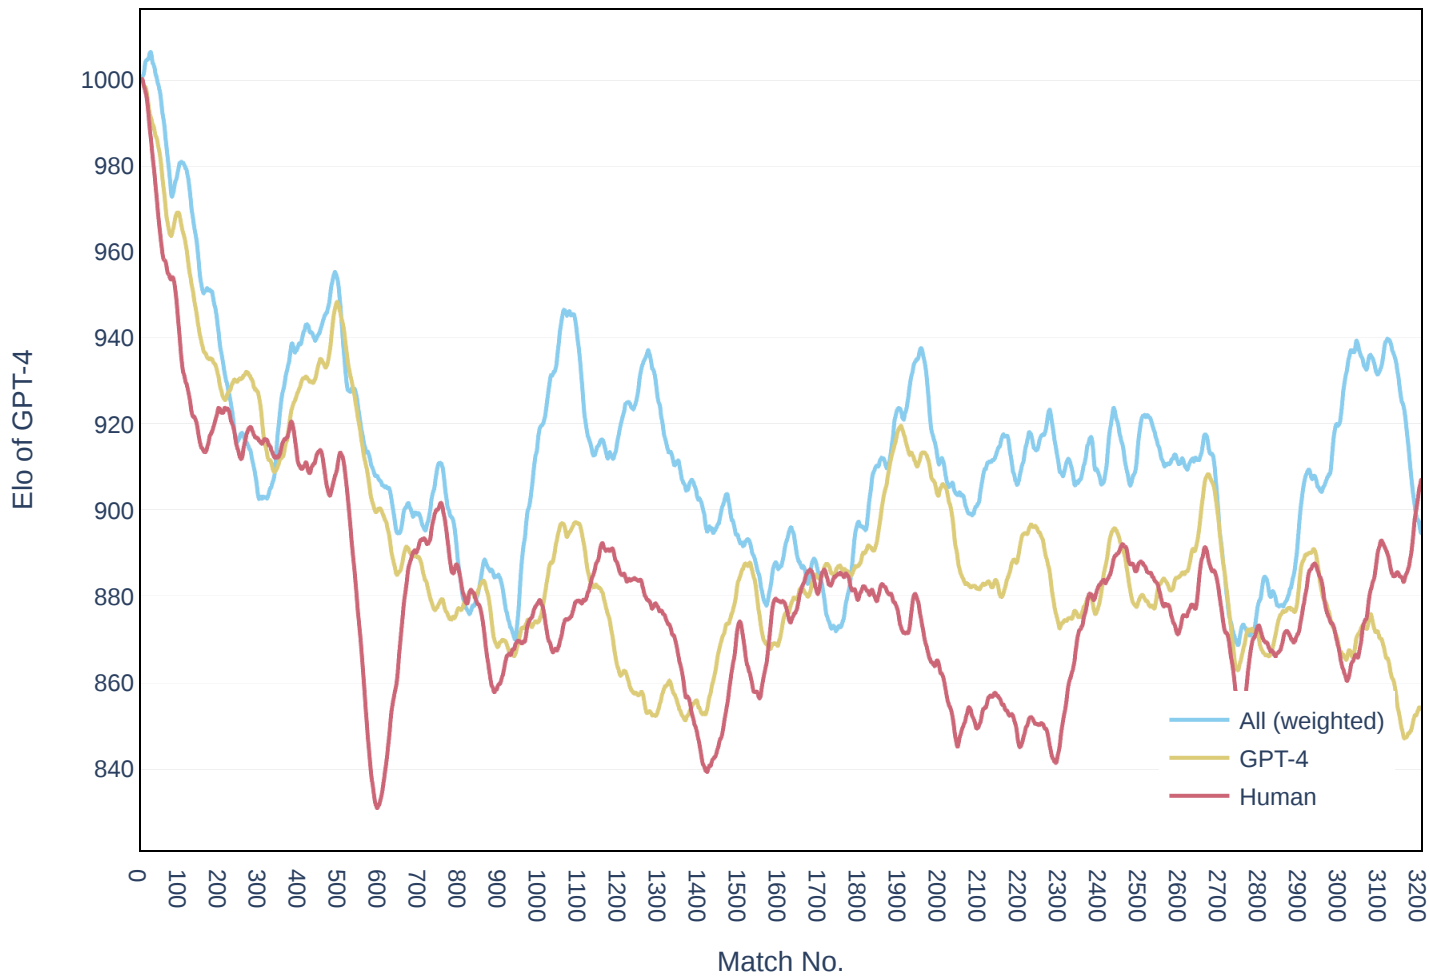

Supplement: supplementary_material [file attachment]

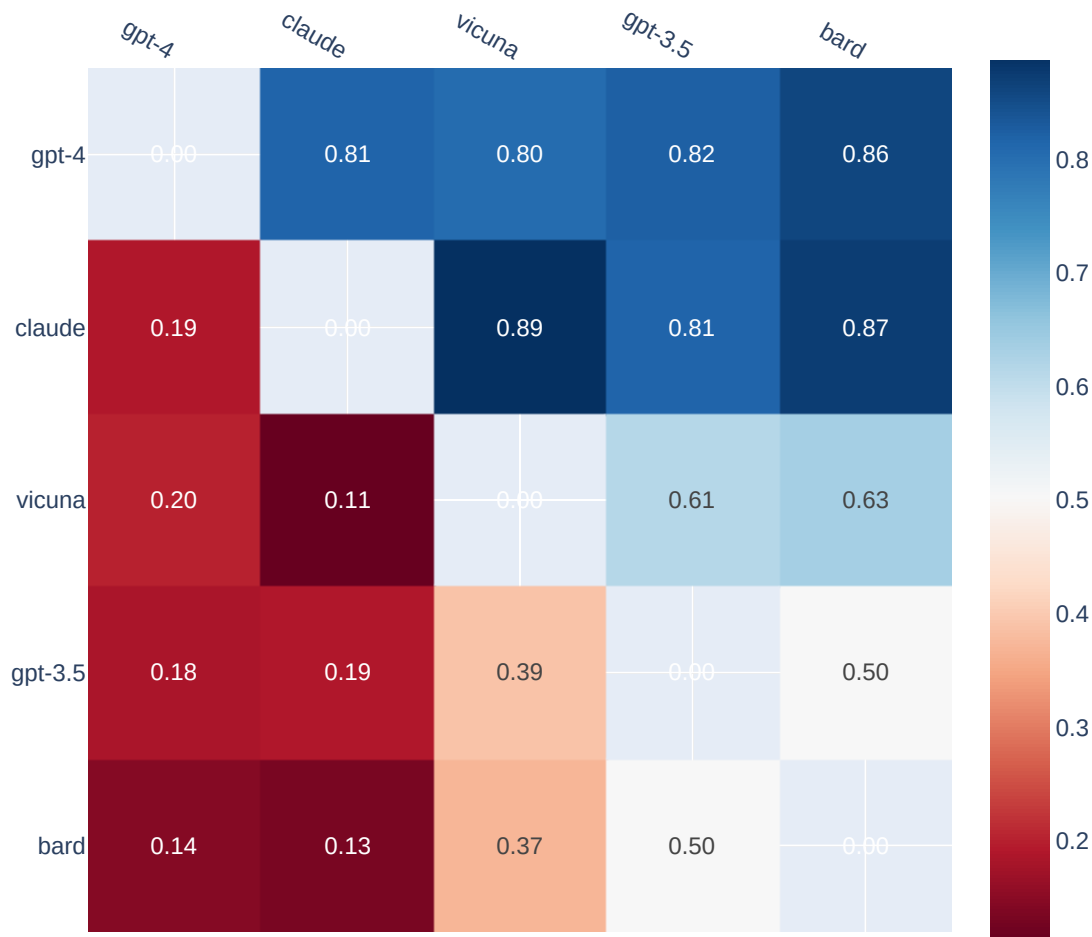

Supplement: supplementary_material [file attachment]

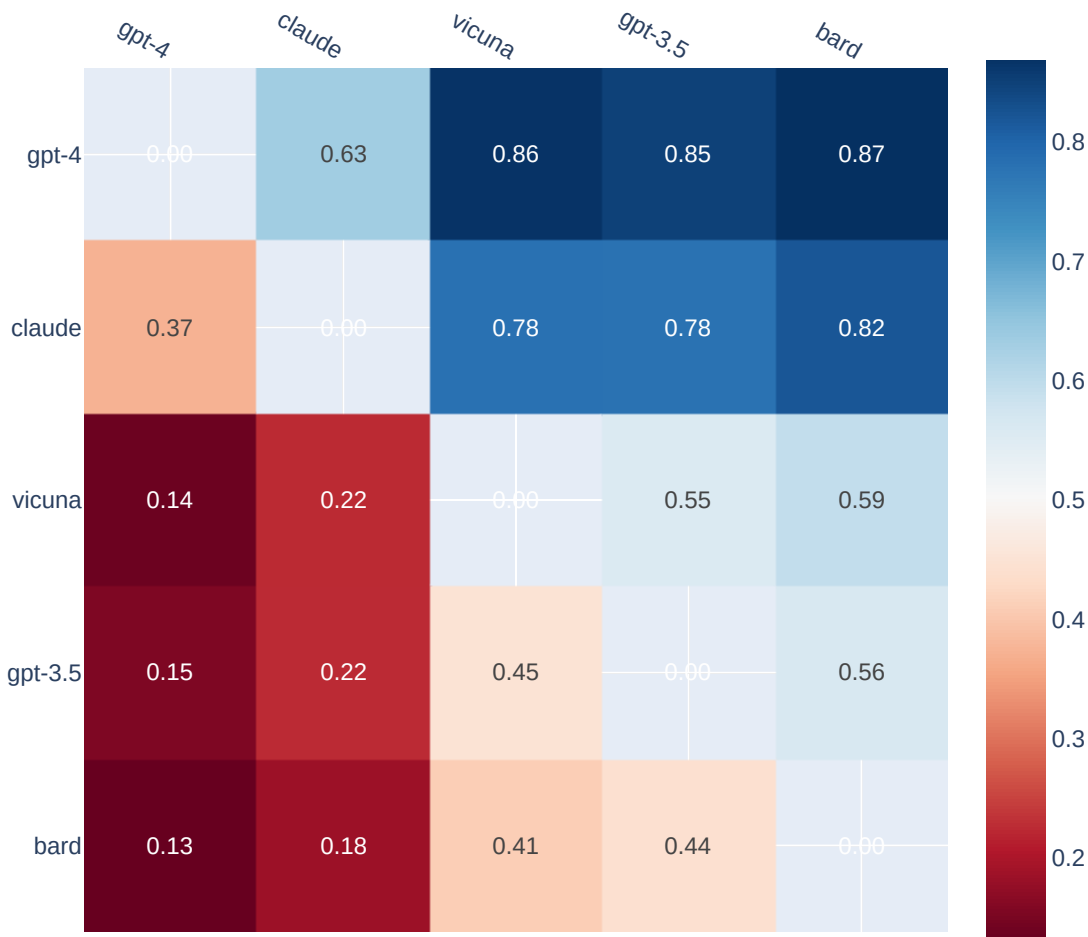

Supplement: supplementary_material [file attachment]

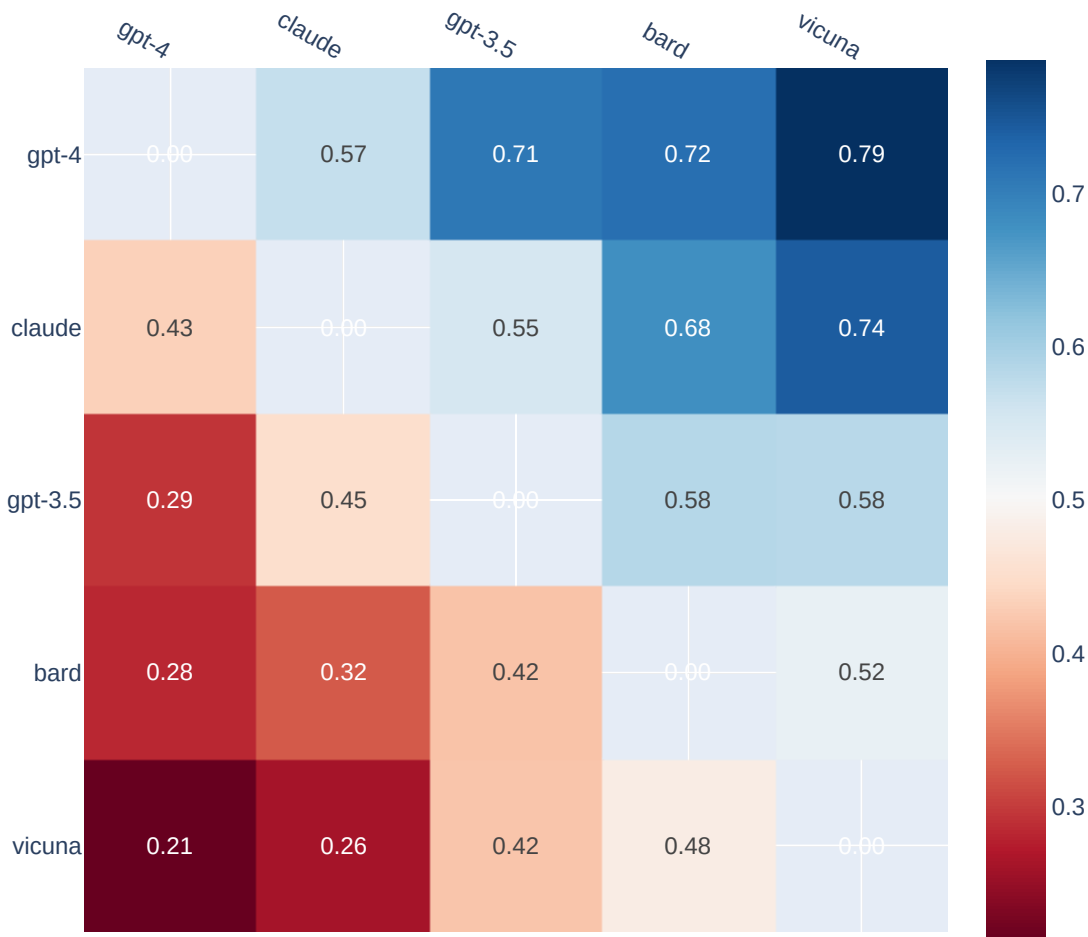

Supplement: supplementary_material [file attachment]

## Weights assigned to each Reviewer

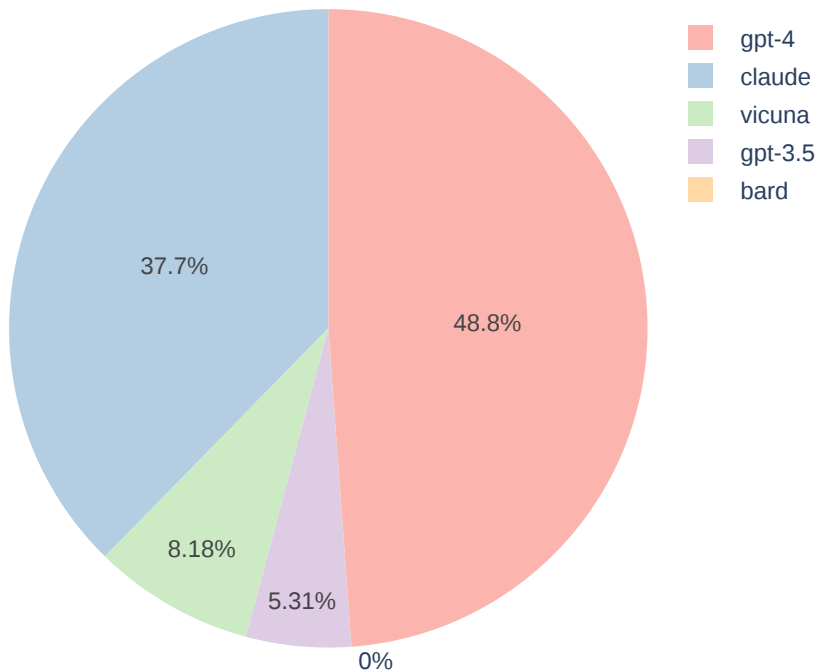

Supplement: supplementary_material [file attachment]

## Elo of GPT-4 from various reviewers

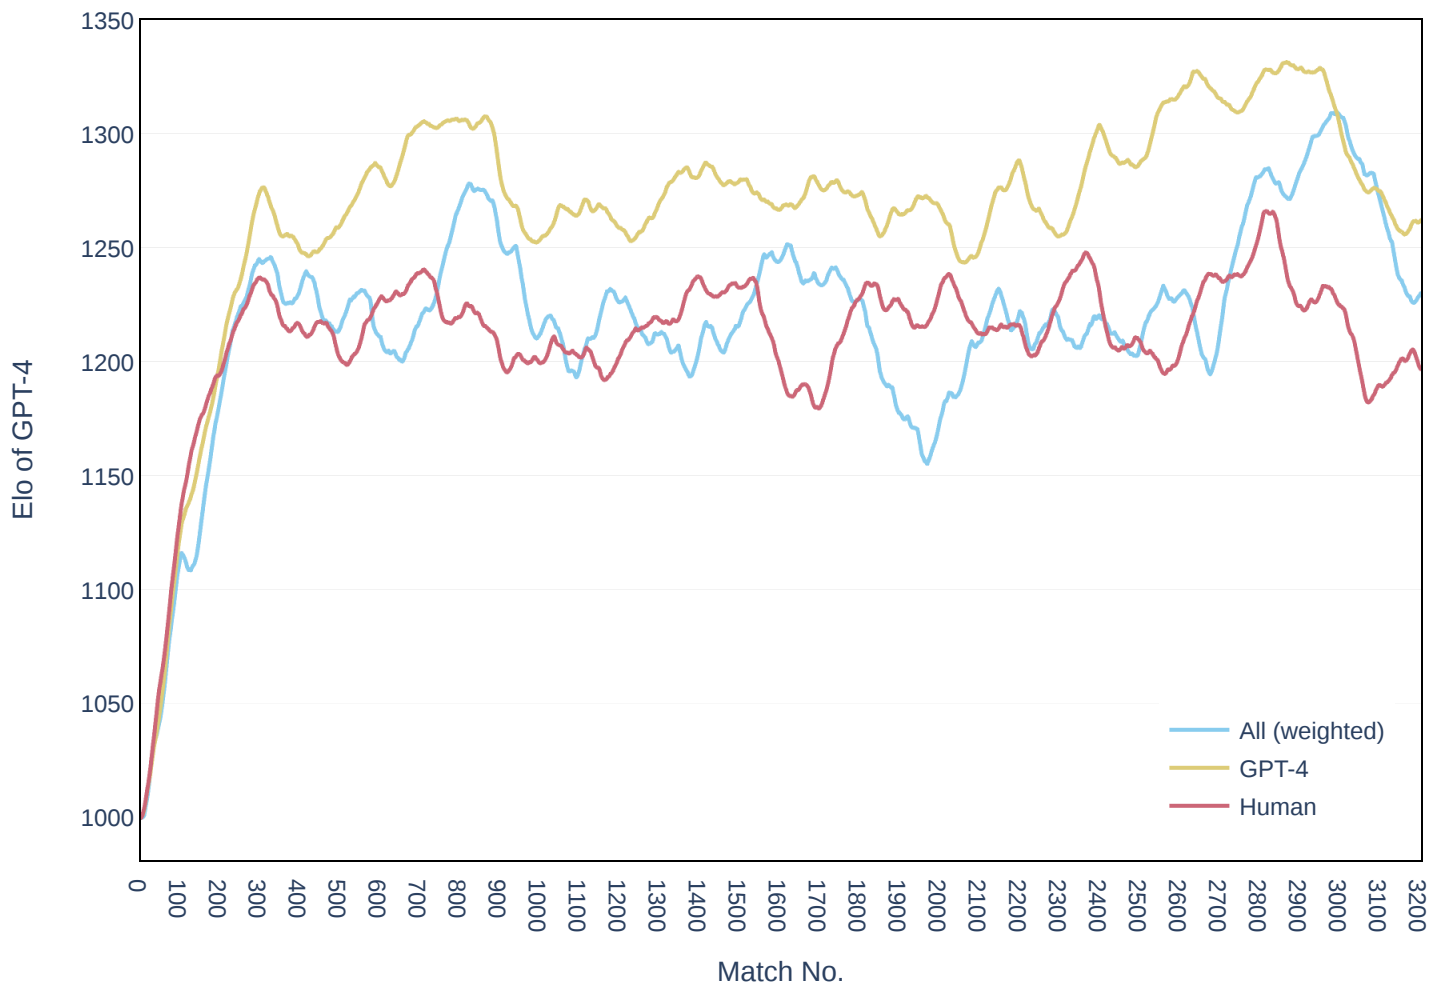

Supplement: supplementary_material [file attachment]

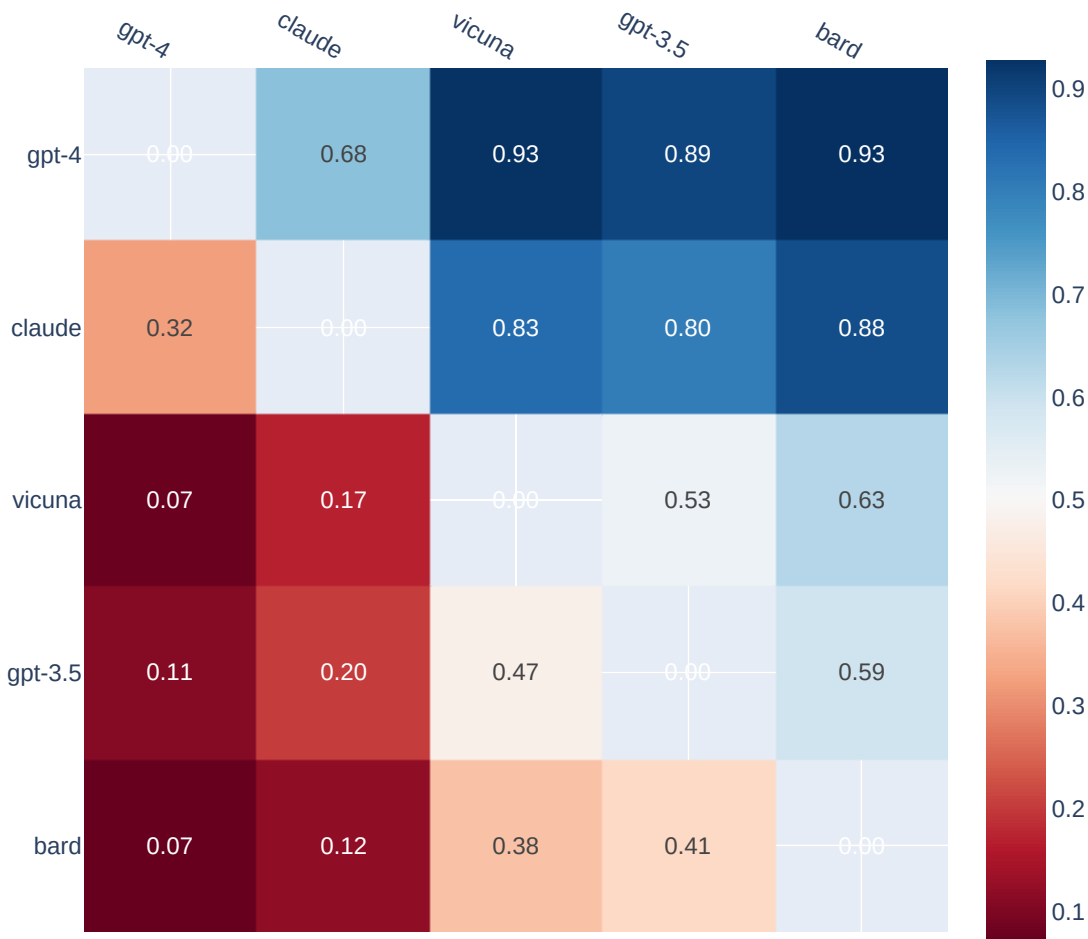

Supplement: supplementary_material [file attachment]

## Elo of GPT-4 from various reviewers

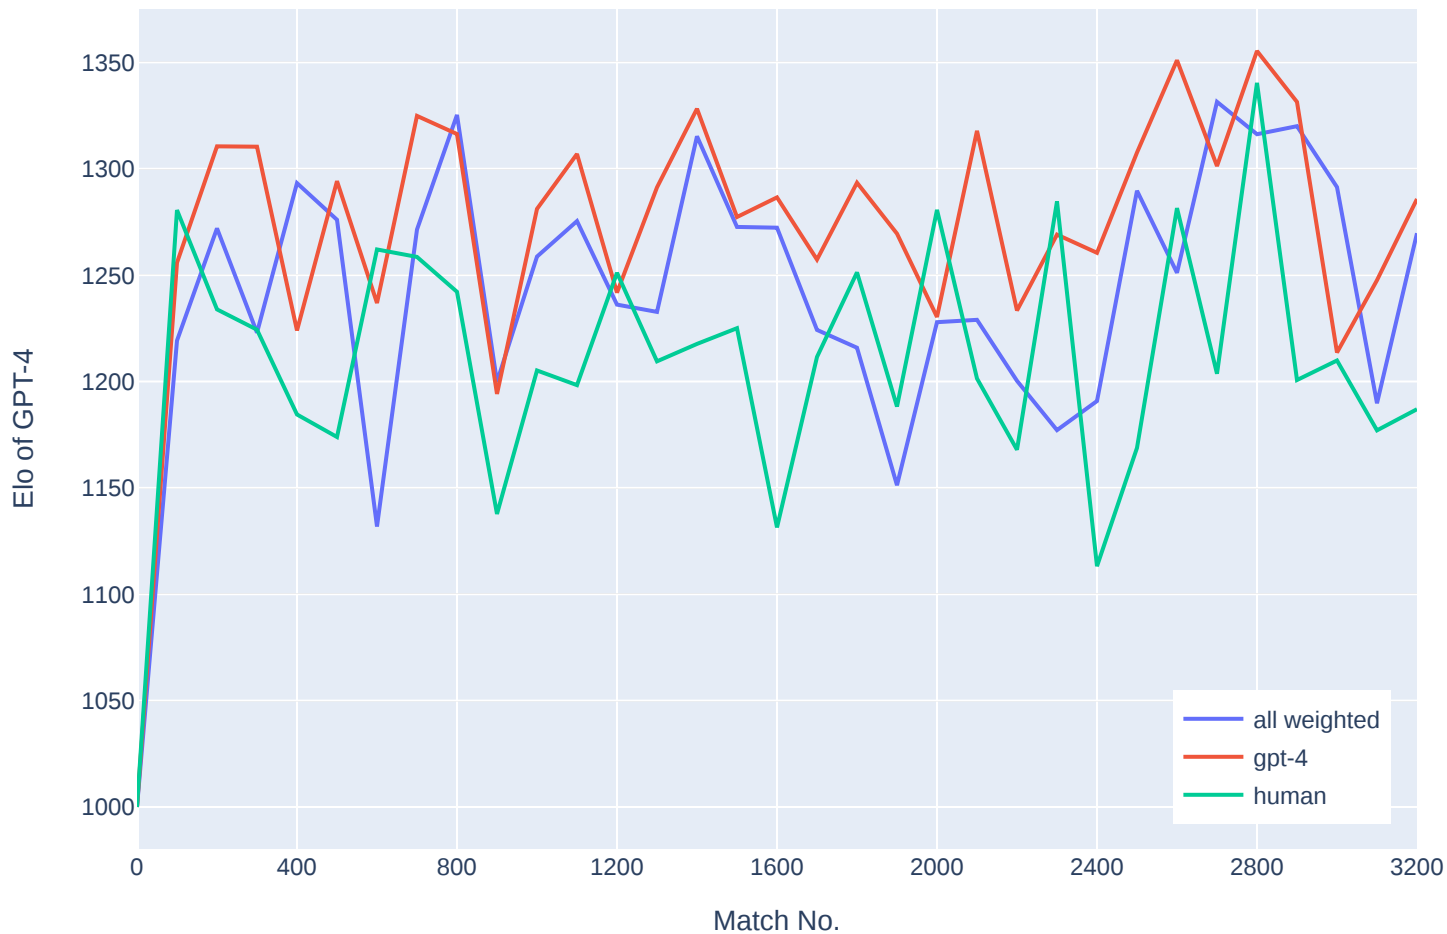

Supplement: supplementary_material [file attachment]

## Elo of GPT-4 from various reviewers

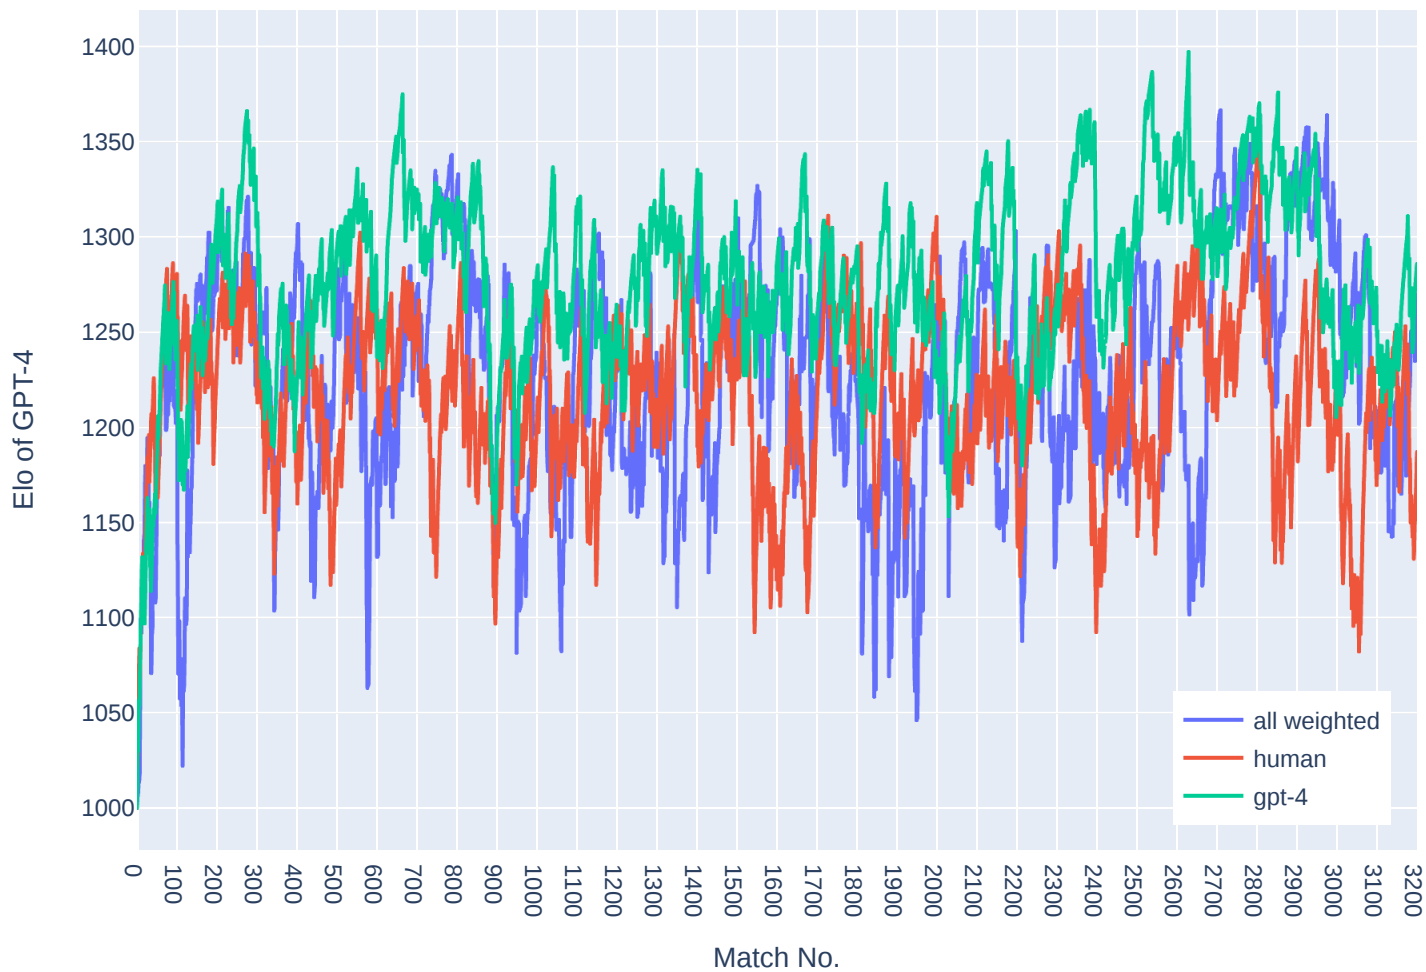

Supplement: supplementary_material [file attachment]

## Elo of GPT-4 from various reviewers

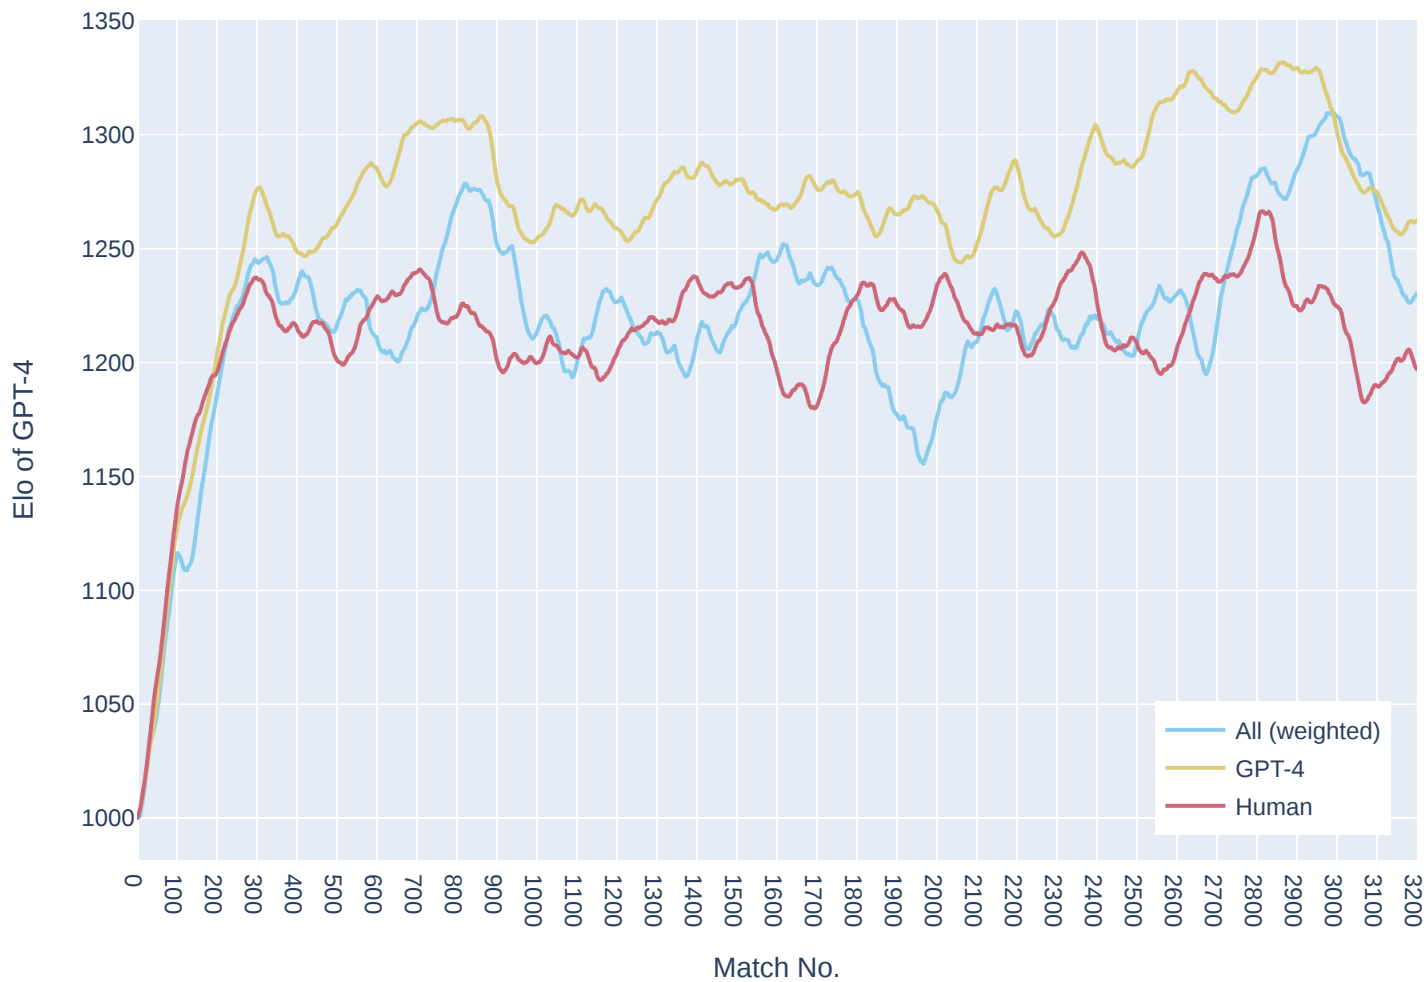

Supplement: supplementary_material [file attachment]
